# Supplementary material for: Surface structural phase transition induced by the formation of metal–organic networks on the Si(111)--In surface
Source: Royal Society of Chemistry journal article supplement (doi:10.1039/c9nr07074e), 2019-01-01
Supplement: c9nr07074e1.pdf [file c9nr07074e1.pdf]

## Electronic Supplementary Information

### Surface structural phase transition induced by formation of metal-organic network on Si(111)- $\sqrt{7} \times \sqrt{3}$ -In surface

T. Suzuki,<sup>a,b</sup> J. Lawrence,<sup>b</sup> J. M. Morbec,<sup>‡c</sup> P. Kratzer,<sup>c</sup> G. Costantini<sup>b</sup>

<sup>a</sup>Department of Electronics Engineering and Computer Science, Fukuoka University, Fukuoka 814-0180, Japan

<sup>b</sup>Department of Chemistry, University of Warwick, Coventry, CV4 7AL, United Kingdom

<sup>c</sup>Faculty of Physics, University of Duisburg-Essen, Lotharstrasse 1, 47057 Duisburg, Germany

<sup>‡</sup>present address: School of Chemical and Physical Sciences, Keele University, Staffordshire ST5 5BG, UK

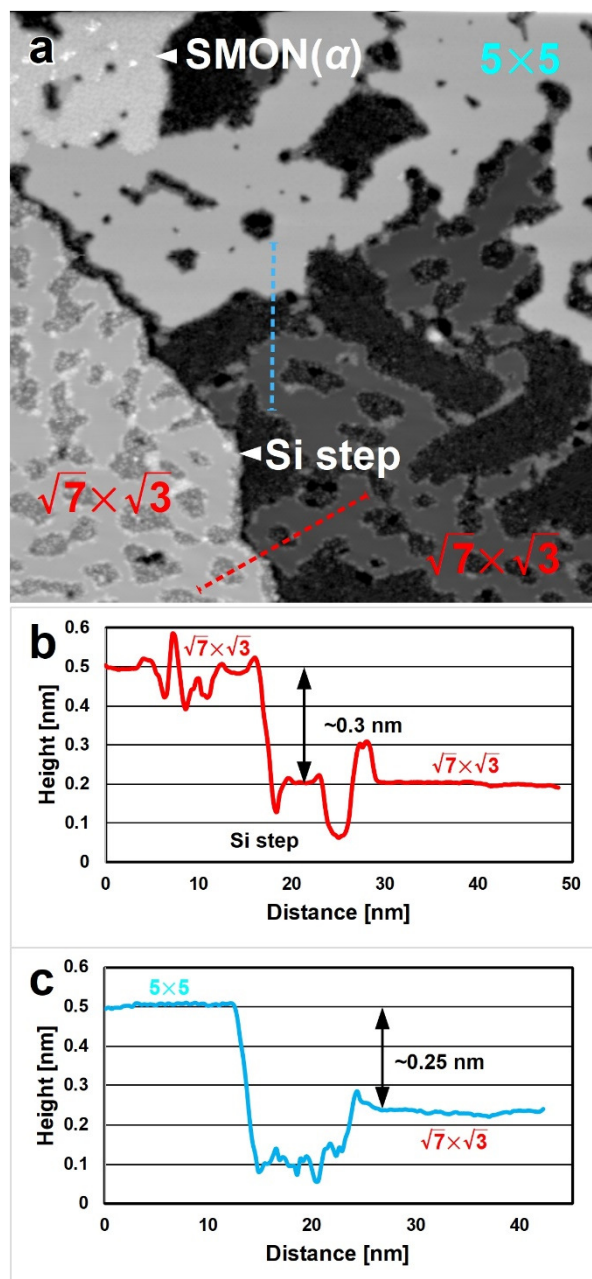

**Figure S1** (a) STM image acquired after TCNQ deposition on the Si(111)- $\sqrt{7} \times \sqrt{3}$ -In surface. (b) and (c) show line profiles measured along the red and the blue dashed lines shown in (a), respectively. The height of a single atomic step on Si(111) is about 0.3 nm (as shown in (b)), while the measured height difference between a  $\sqrt{7} \times \sqrt{3}$  and a  $5 \times 5$  terrace is about 0.25 nm (as shown in (c)). Image size of (a) is  $148 \times 148 \text{ nm}^2$ .

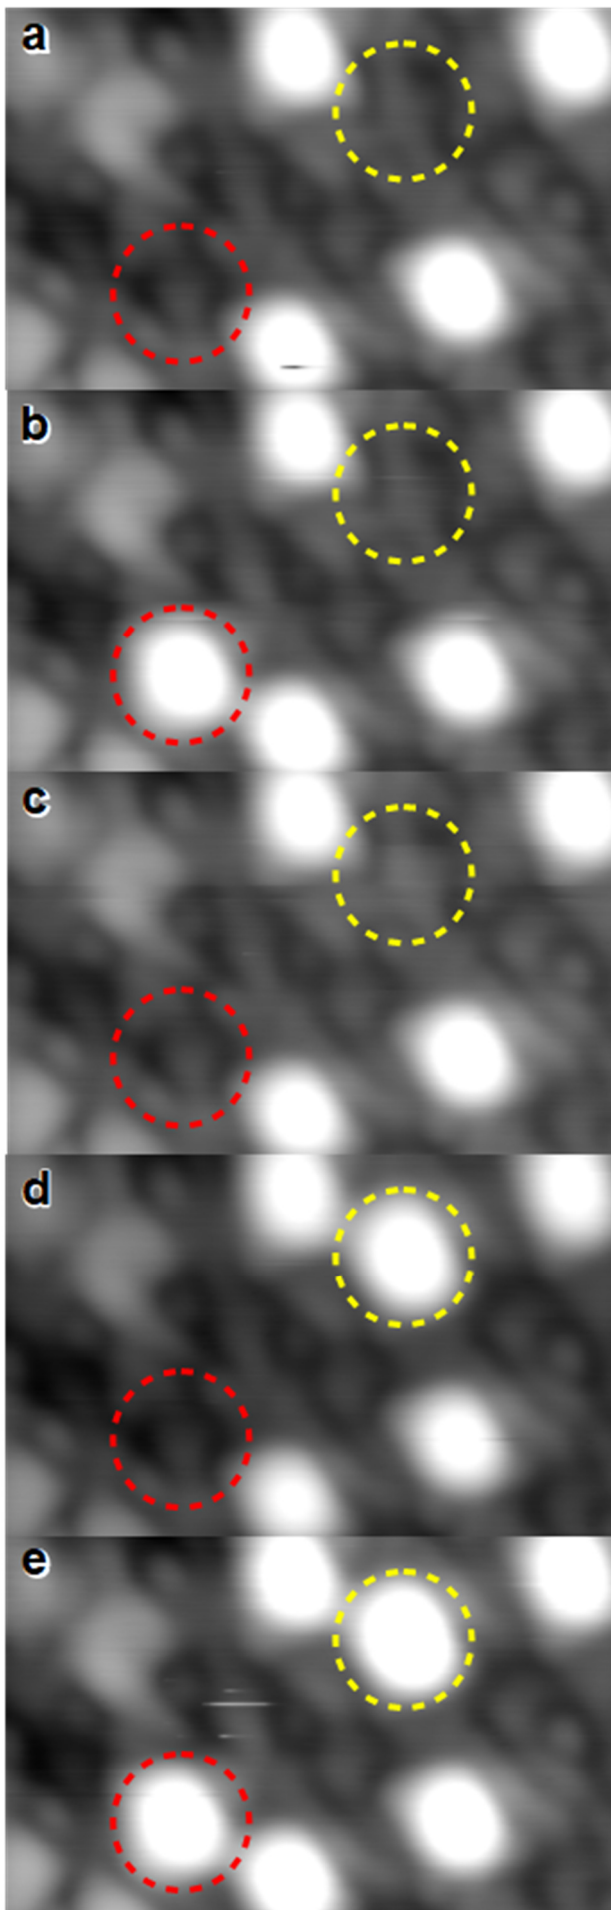

**Figure S2** Five STM images extracted from successive scans taken at the same sample position. Bright humps are disappearing and reappearing at the positions marked by red and yellow circles.

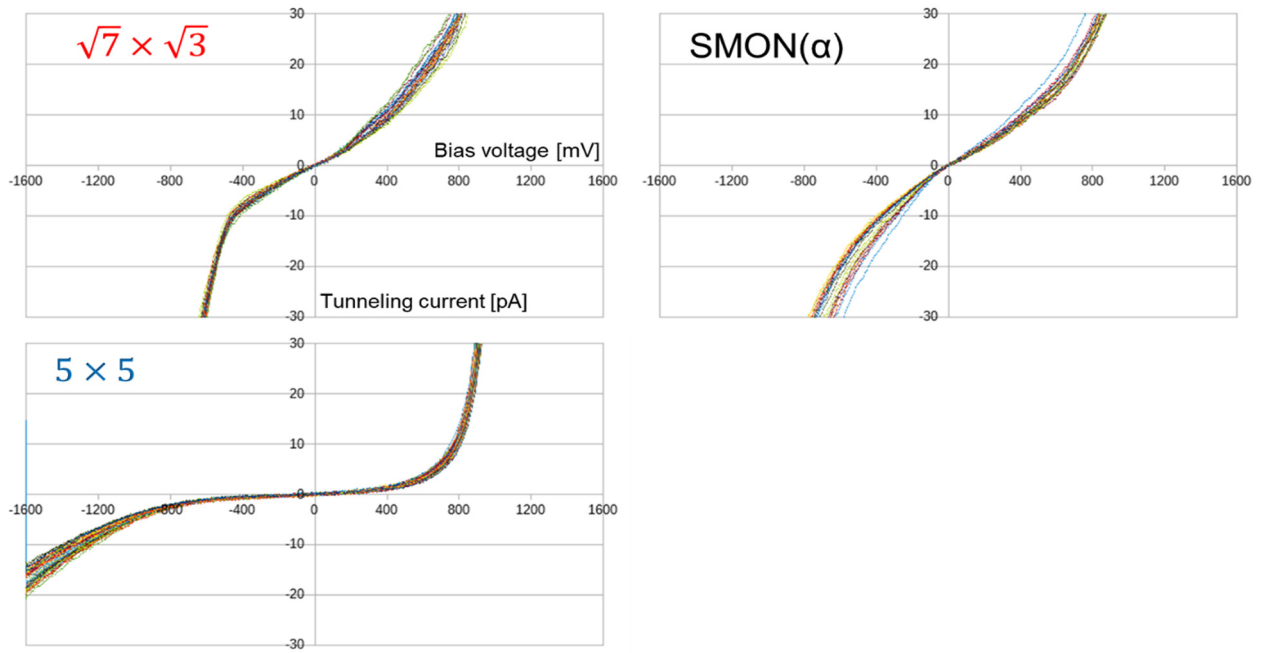

**Figure S3** I-V curves measured on the  $\sqrt{7} \times \sqrt{3}$  reconstruction, on the SMON( $\alpha$ ), and on the  $5 \times 5$  reconstruction. The  $5 \times 5$  reconstruction is more insulating than the others close to the Fermi energy ( $V = 0$ ).

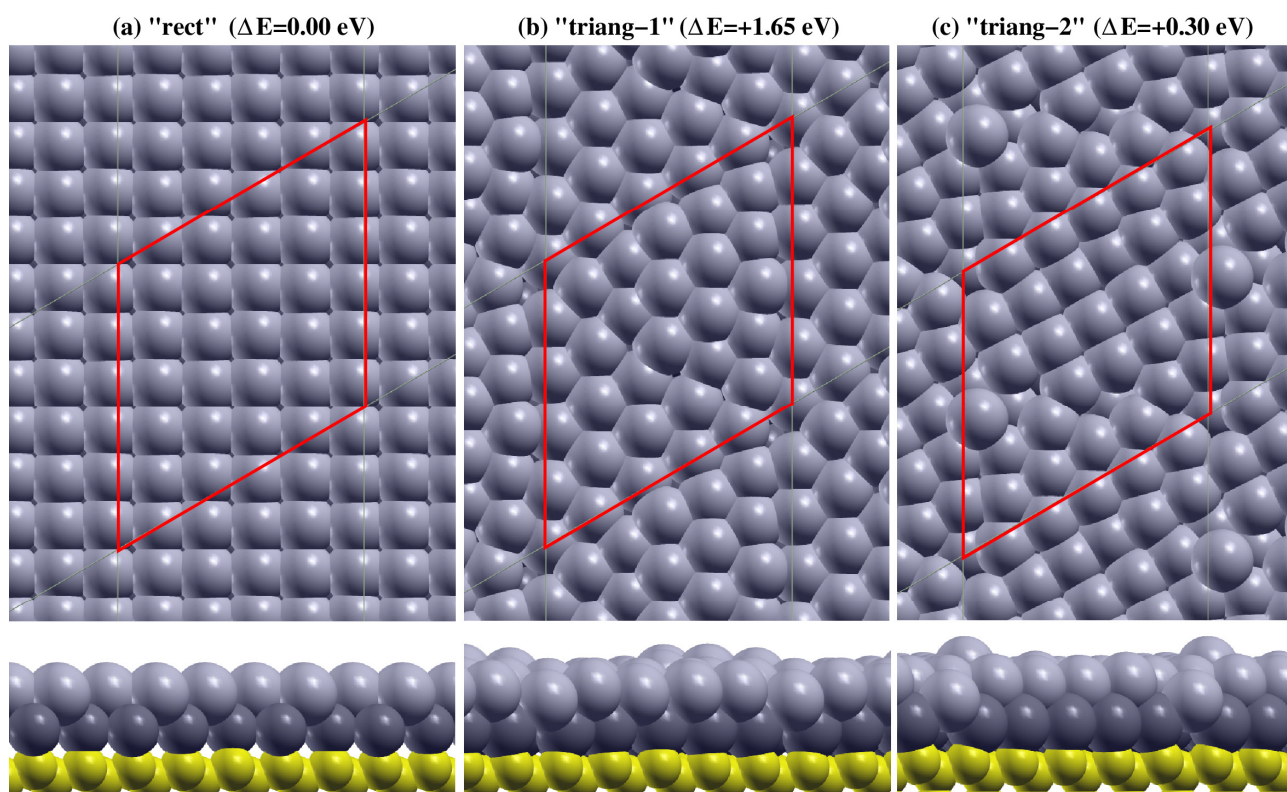

**Figure S4** Top and side views (in SpaceFill display mode) of the (a) “rect”, (b) “triang-1” and (c) “triang-2” configurations with 2.4 ML In-coverage. Yellow spheres represent the Si atoms; bright/dark gray spheres represent top-/bottom-layer In atoms; red lines indicate the  $5 \times 5$  surface unit cell. Relative total energies ( $\Delta E$ ) with respect to the “rect” configuration are shown at the top of each figure.

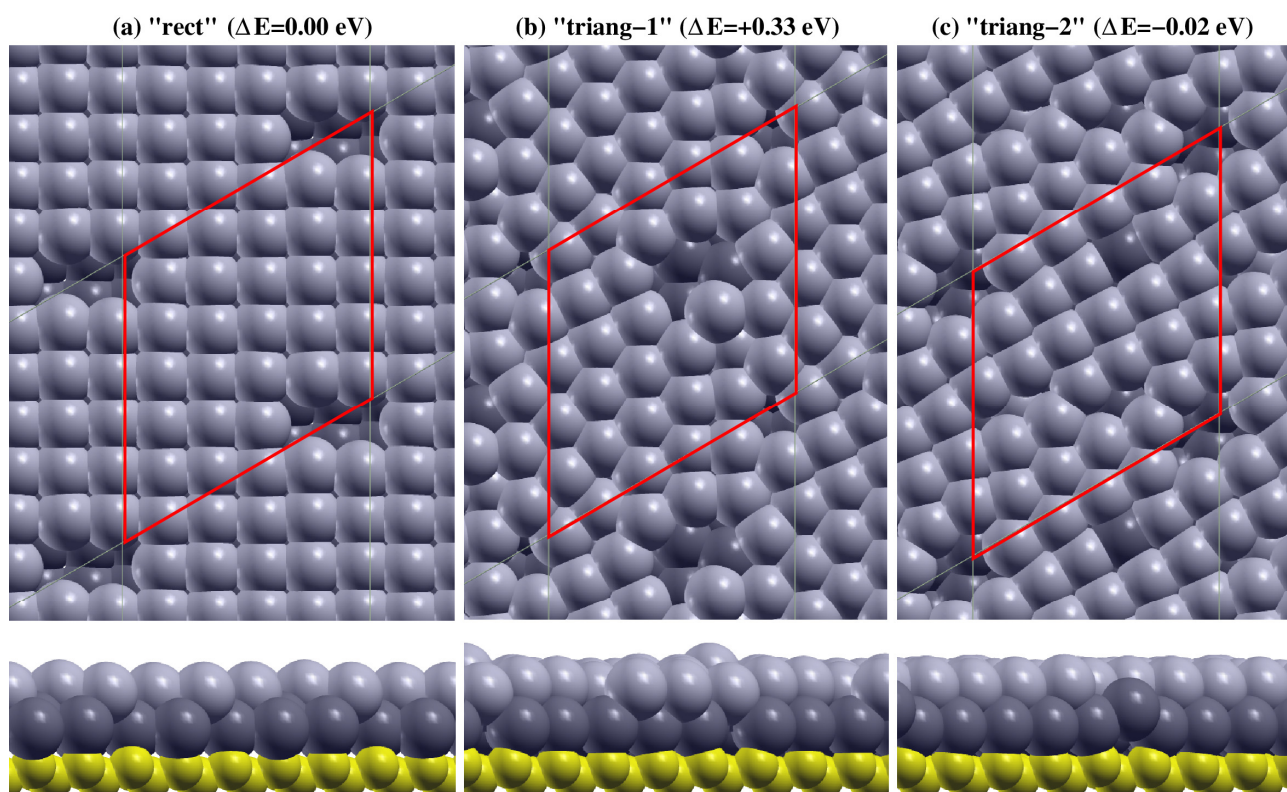

**Figure S5** Top and side views (in SpaceFill display mode) of the (a) “rect”, (b) “triang-1” and (c) “triang-2” configurations with 2.32 ML In-coverage. Yellow spheres represent the Si atoms; bright/dark gray spheres represent top-/bottom-layer In atoms; red lines indicate the  $5 \times 5$  surface unit cell. Relative total energies ( $\Delta E$ ) with respect to the “rect” configuration are shown at the top of each figure.



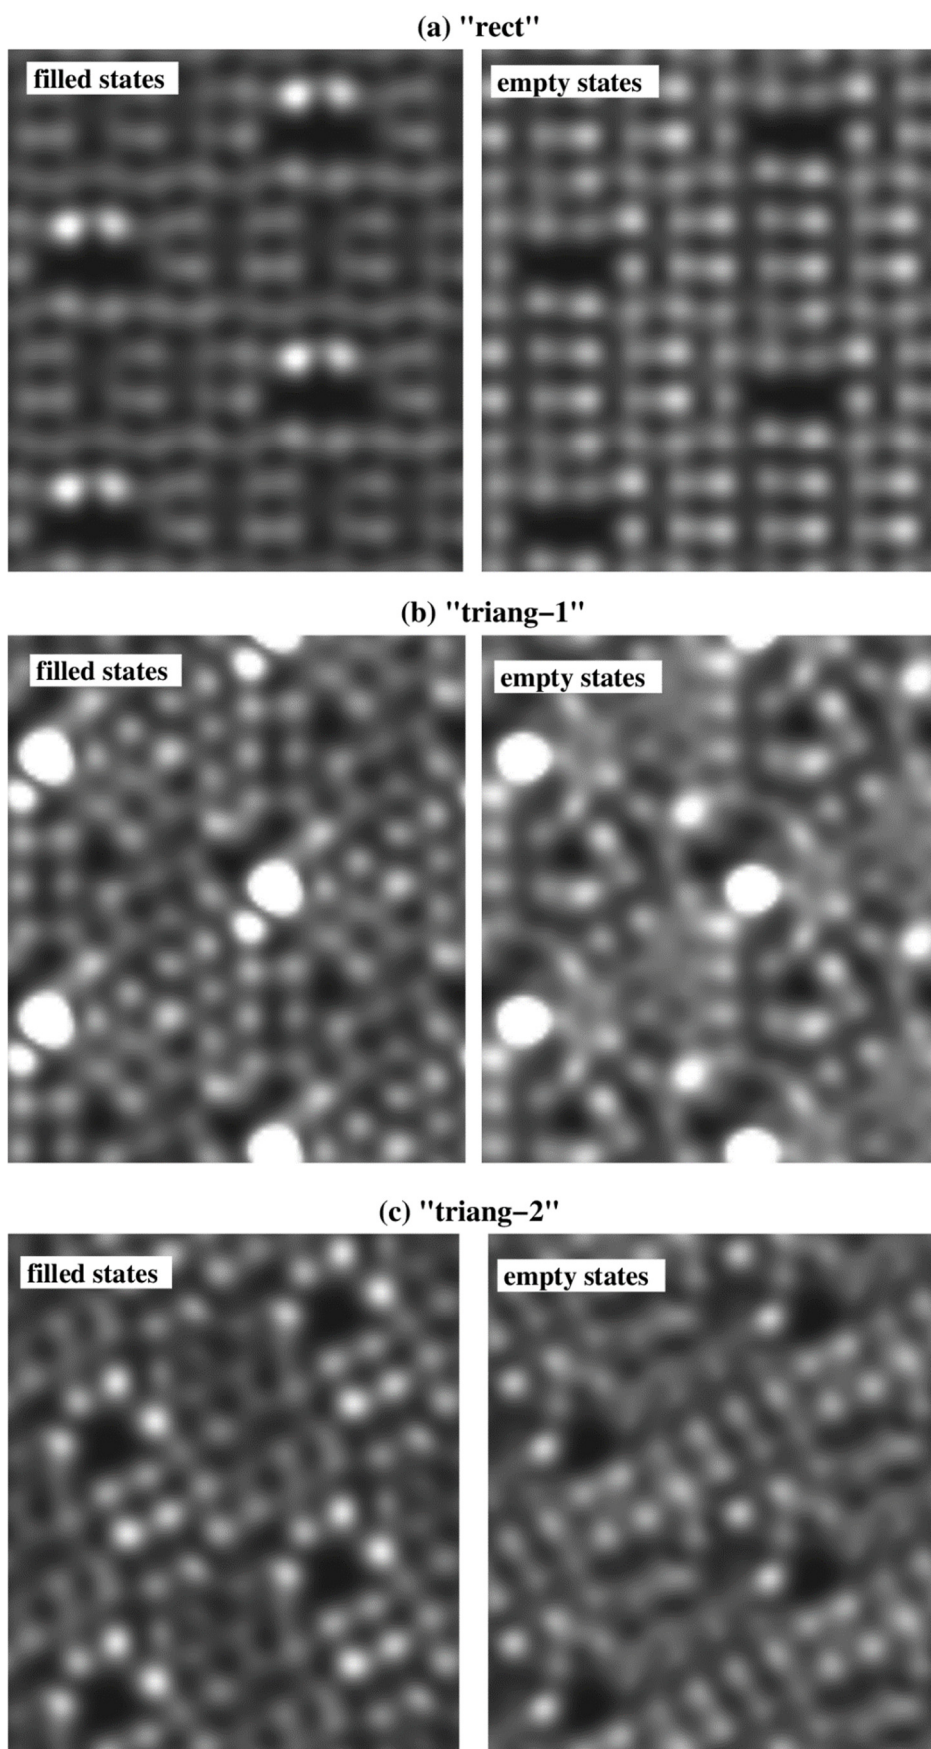

**Figure S6** Simulated STM images (obtained at a constant density of  $5 \times 10^{-3} \text{ \AA}^{-3}$ ) of the (a) "rect", (b) "triang-1" and (c) "triang-2" configurations with 2.32 ML In-coverage.

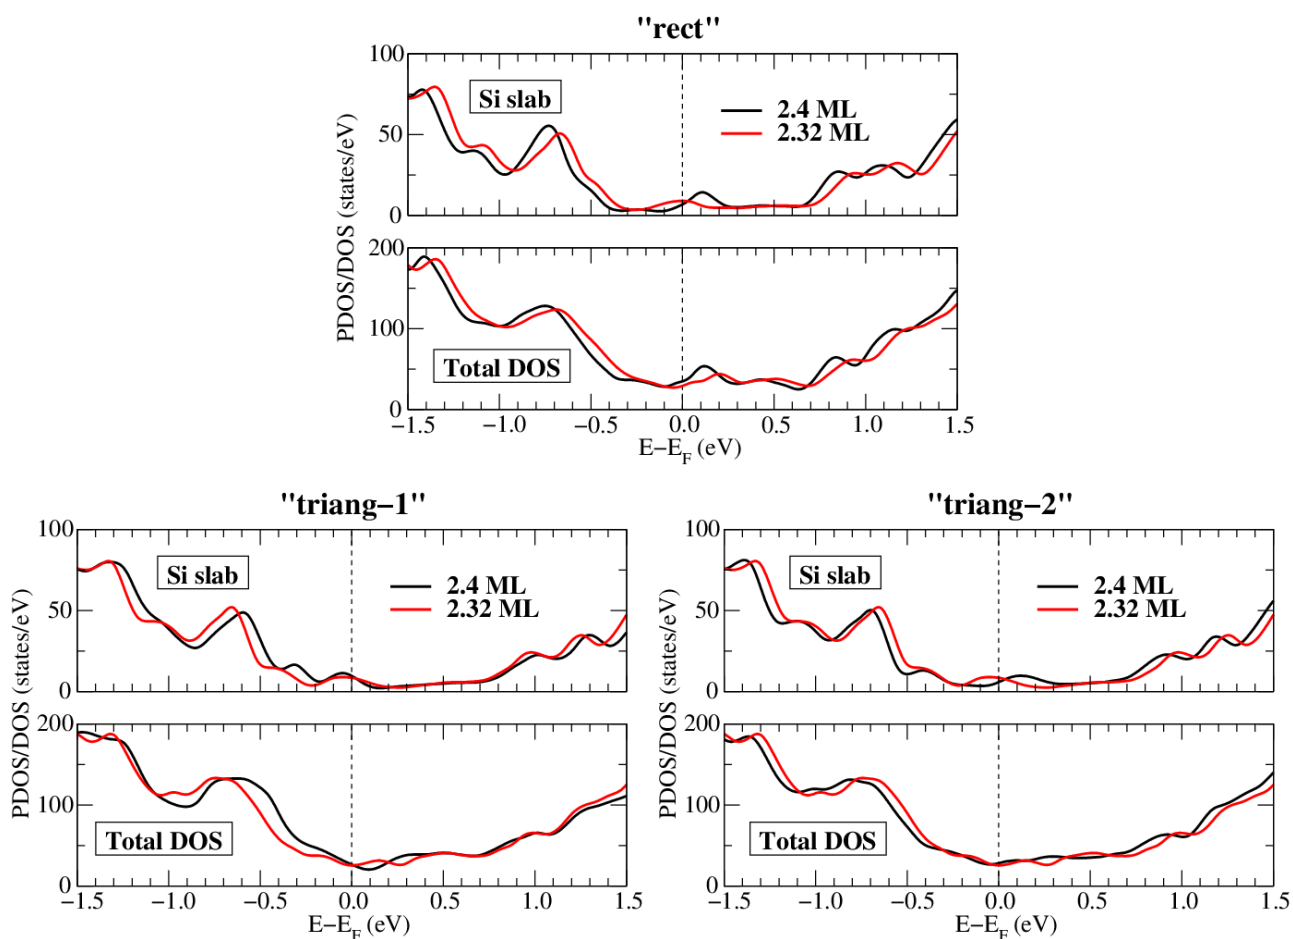

**Figure S7** Projected (PDOS) and total density of states (DOS) for the “rect” and the two “triang” configurations with In-coverage of 2.4 and 2.32 ML. Top and bottom panels show PDOS of Si slab and total DOS, respectively.
